# Supplementary material for: Synthesis, Physiochemical and Biological evaluation of Inclusion Complex of Benzyl Isothiocyanate encapsulated in cyclodextrins for triple negative breast cancer
Source: bioRxiv or medRxiv preprint supplement (doi:10.1101/2021.02.14.430873), 2021-02-15
Supplement: Supplementary file [file media-1.pdf]

## SUPPLEMENTARY INFORMATION

Figure S1: DSC Thermograms of (A) BITC,  $\beta$ -CD BITC and  $\beta$ -CD (B) BITC, HP- $\beta$ -CD BITC and HP- $\beta$ -CD

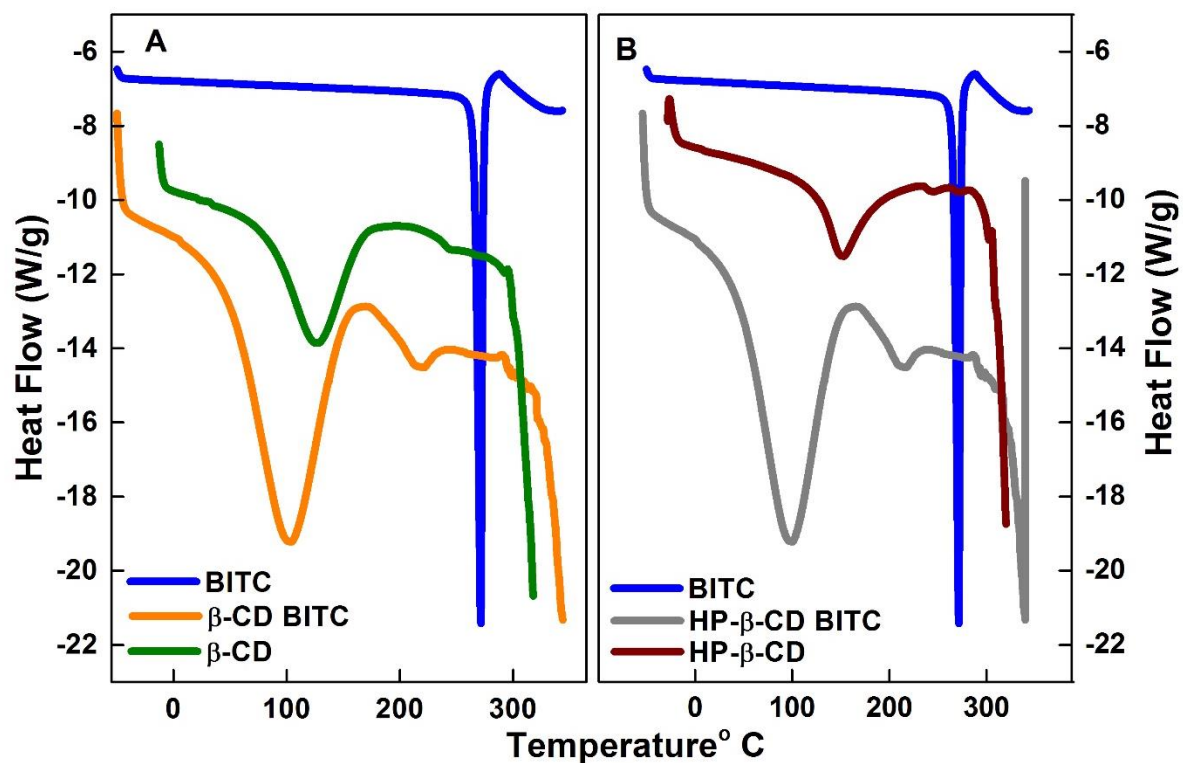

Figure S2. Electron density profiles for  $\beta$ -CD BITC and HP- $\beta$ -CD BITC

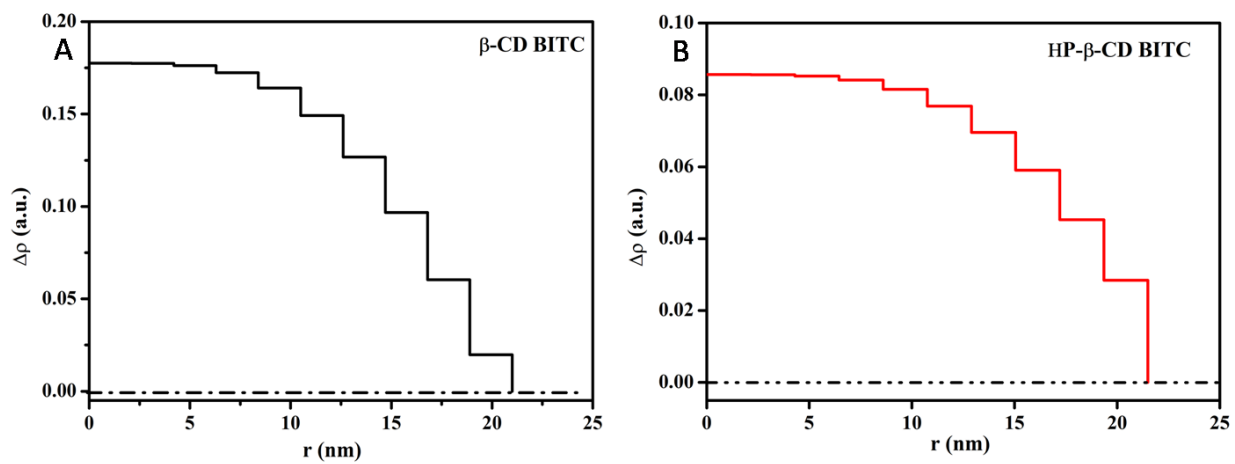

Figure S3. Cumulative Release profile of BITC

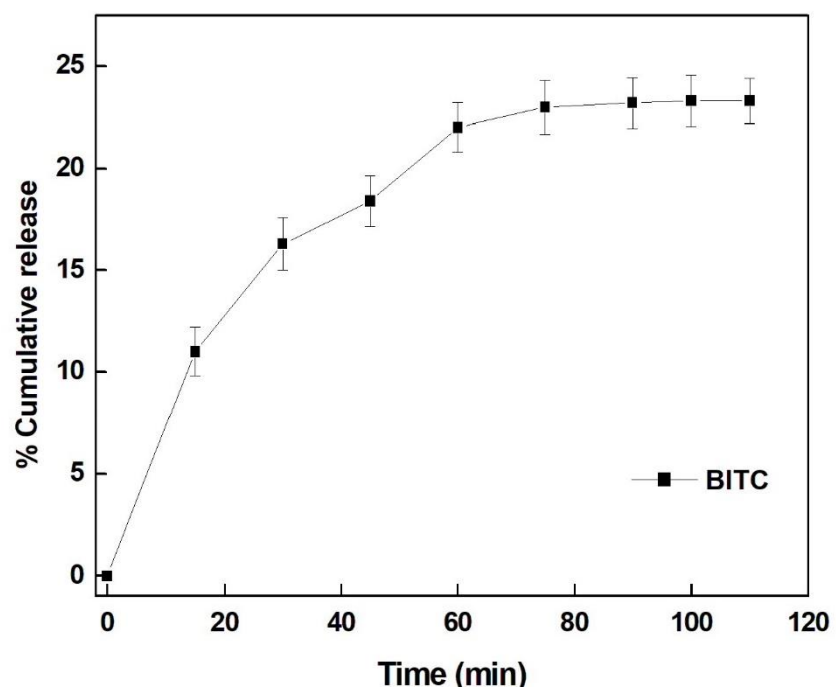

**Table S1 Kinetic Models for the release of BITC from  $\beta$ -CD and HP- $\beta$ -CD at pH 7.2 and 5.5**

| <b>Kinetic Model</b>    |                         | <b><math>\beta</math>-CD BITC<br/>(pH 5.5)</b> | <b><math>\beta</math>-CD BITC<br/>(pH 7.2)</b> | <b>HP-<math>\beta</math>-CD BITC<br/>(pH 5.5)</b> | <b>HP-<math>\beta</math>-CD BITC<br/>(pH 7.2)</b> |
|-------------------------|-------------------------|------------------------------------------------|------------------------------------------------|---------------------------------------------------|---------------------------------------------------|
| Zero order              | $k_0$                   | 0.235                                          | 0.202                                          | 0.275                                             | 0.249                                             |
|                         | $R^2$                   | 0.681                                          | 0.756                                          | 0.654                                             | 0.556                                             |
| First order             | $k_1$                   | 0.004                                          | 0.003                                          | 0.006                                             | 0.005                                             |
|                         | $R^2$                   | 0.895                                          | 0.903                                          | 0.925                                             | 0.853                                             |
| Higuchi                 | $k_H$                   | 3.795                                          | 3.234                                          | 4.449                                             | 4.072                                             |
|                         | $R^2$                   | 0.942                                          | 0.936                                          | 0.974                                             | 0.935                                             |
| <b>Korsmeyer-Peppas</b> | <b><math>k_P</math></b> | <b>4.265</b>                                   | <b>4.591</b>                                   | <b>5.996</b>                                      | <b>6.294</b>                                      |
|                         | <b>N</b>                | <b>0.478</b>                                   | <b>0.441</b>                                   | <b>0.444</b>                                      | <b>0.419</b>                                      |
|                         | <b><math>R^2</math></b> | <b>0.992</b>                                   | <b>0.993</b>                                   | <b>0.994</b>                                      | <b>0.989</b>                                      |
| Hixson-Crowell          | $k_{HC}$                | 0.001                                          | 0.001                                          | 0.002                                             | 0.001                                             |
|                         | $R^2$                   | 0.843                                          | 0.873                                          | 0.870                                             | 0.780                                             |
